# Supplementary material for: Statistical and Biological Gene-Lifestyle Interactions of MC4R and FTO with Diet and Physical Activity on Obesity: New Effects on Alcohol Consumption
Source: PubMed Central journal article supplement (PMC3528751; doi:10.1371/journal.pone.0052344), 2012-12-21

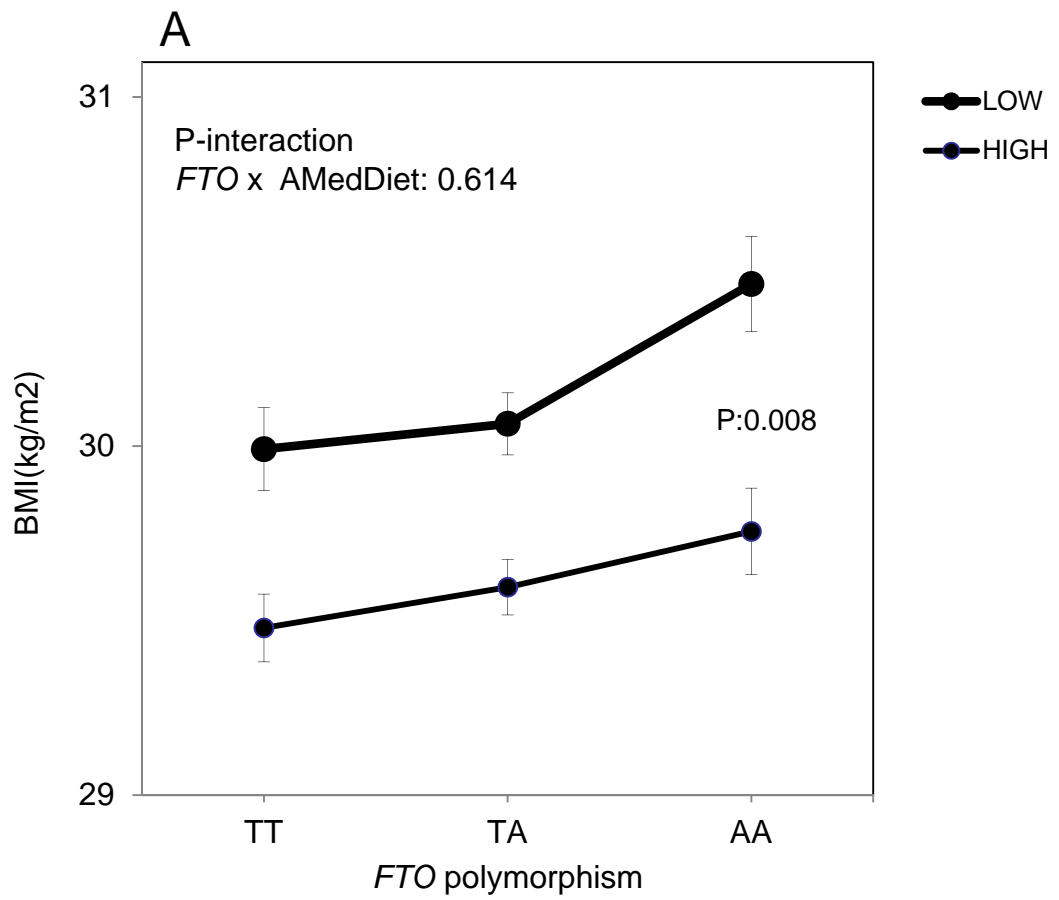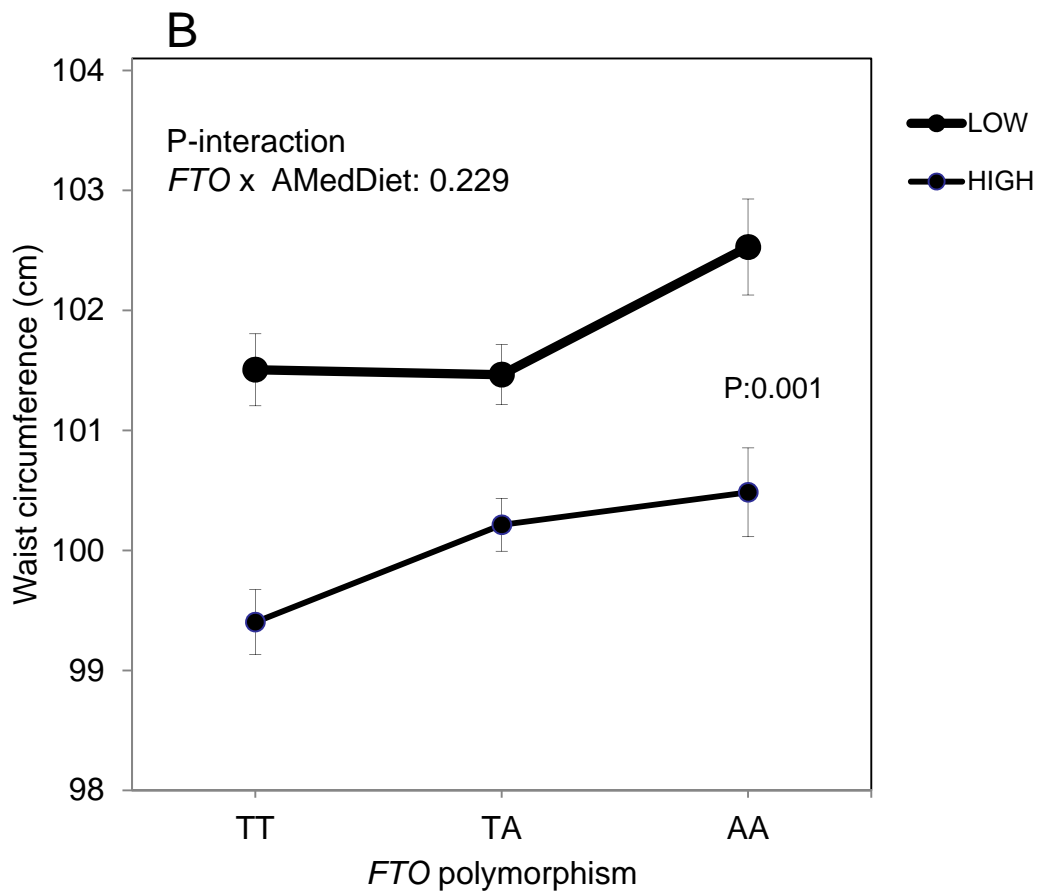

Supplement: pone.0052344.s002.pdf [file pone.0052344.s002.pdf]
