# Supplementary material for: Statistical and Biological Gene-Lifestyle Interactions of MC4R and FTO with Diet and Physical Activity on Obesity: New Effects on Alcohol Consumption
Source: PubMed Central journal article supplement (PMC3528751; doi:10.1371/journal.pone.0052344), 2012-12-21
Supplement: pone.0052344.s003.pdf [file pone.0052344.s003.pdf]

**Table S1: Association between the *FTO* rs9939609 and *MC4R* rs17782313 polymorphisms and food and alcohol intake in the Mediterranean population**

|                       | FTO (n=7,052)  |    |                |    |               |    | <i>P</i> <sup>1</sup> | Adjusted              |                       | MC4R (n=7,019) |    |                |    |                |    | <i>P</i> <sup>1</sup> | Adjusted              |                       |
|-----------------------|----------------|----|----------------|----|---------------|----|-----------------------|-----------------------|-----------------------|----------------|----|----------------|----|----------------|----|-----------------------|-----------------------|-----------------------|
|                       | TT             |    | TA             |    | AA            |    |                       | B (95% CI)            | <i>P</i> <sup>2</sup> | CC             |    | CT             |    | TT             |    |                       | B (95% CI)            | <i>P</i> <sup>2</sup> |
|                       | Mean           | SD | Mean           | SD | Mean          | SD |                       |                       |                       | Mean           | SD | Mean           | SD | Mean           | SD |                       |                       |                       |
| Energy intake, kcal/d | 2288.2 (616.1) |    | 2277.3 (606.4) |    | ##### (593.9) |    | 0.208                 | -18.63 (-37.65, 0.39) | 0.055                 | 2274.3 (607.1) |    | 2279.2 (611.4) |    | 2309.4 (593.0) |    | 0.596                 | 11.74 (-11.45, 34.40) | 0.327                 |
| Total fat, g/d        | 98.6 (30.4)    |    | 99.4 (30.9)    |    | 97.8 (29.7)   |    | 0.265                 | -0.39 (-1.33, 0.54)   | 0.405                 | 98.7 (30.7)    |    | 98.9 (30.7)    |    | 101.3 (30.2)   |    | 0.340                 | 0.46 (-0.66, 1.58)    | 0.192                 |
| SFA, g/d              | 25.2 (9.3)     |    | 25.5 (9.2)     |    | 25.0 (9.1)    |    | 0.161                 | -0.14 (-0.43, 0.16)   | 0.359                 | 25.3 (9.3)     |    | 25.3 (9.1)     |    | 26.3 (9.4)     |    | 0.137                 | 0.22 (-0.14, 0.57)    | 0.233                 |
| MUFA, g/d             | 48.9 (16.1)    |    | 49.1 (16.2)    |    | 48.4 (15.7)   |    | 0.381                 | -0.24 (-0.72, 0.23)   | 0.318                 | 48.9 (16.2)    |    | 48.9 (15.9)    |    | 50.2 (16.0)    |    | 0.357                 | 0.14 (-0.43, 0.72)    | 0.334                 |
| PUFA, g/d             | 15.7 (6.8)     |    | 16.0 (7.2)     |    | 15.7 (7.0)    |    | 0.381                 | 0.04 (-0.19, 0.27)    | 0.725                 | 15.9 (7.0)     |    | 15.9 (7.0)     |    | 16.0 (6.9)     |    | 0.890                 | 0.05 (-0.23, 0.32)    | 0.692                 |
| Proteins, g/d         | 92.8 (23.4)    |    | 92.9 (23.4)    |    | 91.8 (22.6)   |    | 0.314                 | -0.57 (-1.32, 0.19)   | 0.144                 | 92.4 (23.2)    |    | 93.2 (23.6)    |    | 93.7 (22.4)    |    | 0.310                 | 0.82 (-0.10, 1.73)    | 0.079                 |
| Carbohydrates, g/d    | 242.0 (83.1)   |    | 238.2 (80.1)   |    | 237.3 (80.1)  |    | 0.136                 | -2.34 (-4.90, 0.25)   | 0.065                 | 239.0 (80.3)   |    | 240.0 (83.4)   |    | 243.2 (78.0)   |    | 0.618                 | 1.99 (-1.13, 5.11)    | 0.198                 |
| Alcohol, g/d          | 8.8 (14.7)     |    | 8.3 (13.9)     |    | 7.7 (13.8)    |    | 0.113                 | -0.49 (-0.91, -0.07)  | <b>0.021</b>          | 8.7 (14.7)     |    | 8.0 (13.3)     |    | 7.2 (12.2)     |    | 0.067                 | -0.62 (-1.12, -0.11)  | <b>0.018</b>          |
| Wine, g/d             | 61.5 (113.2)   |    | 56.4 (104.6)   |    | 52.6 (99.6)   |    | <b>0.043</b>          | -4.06 (-7.28, -0.84)  | <b>0.014</b>          | 58.8 (110.2)   |    | 55.5 (101.0)   |    | 50.0 (94.7)    |    | 0.219                 | -3.38 (-7.24, 0.50)   | 0.090                 |
| Beer, g/d             | 45.3 (143.1)   |    | 44.8 (131.9)   |    | 38.0 (124.7)  |    | 0.240                 | -4.18 (-8.50, 0.14)   | <b>0.058</b>          | 47.2 (145.6)   |    | 39.5 (114.9)   |    | 36.4 (124.5)   |    | <b>0.049</b>          | -6.52 (-11.76, -1.29) | <b>0.016</b>          |
| Adherence to MedDiet* | 8.6 (2.0)      |    | 8.7 (2.0)      |    | 8.7 (1.9)     |    | 0.893                 | 0.02 (-0.04, 0.08)    | 0.534                 | 8.7 (2.0)      |    | 8.7 (2.0)      |    | 8.6 (1.9)      |    | 0.689                 | -0.02 (-0.10, 0.05)   | 0.641                 |
| Vegetales, g/d        | 337.8 (161.4)  |    | 338.1 (144.0)  |    | 339.0 (147.6) |    | 0.975                 | -0.34 (-5.13, 4.44)   | 0.880                 | 338.8 (152.2)  |    | 337.4 (149.0)  |    | 341.5 (142.9)  |    | 0.875                 | 1.00 (-4.77, 6.77)    | 0.702                 |
| Fruits, g/d           | 372.2 (212.7)  |    | 369.2 (206.5)  |    | 377.1 (203.3) |    | 0.509                 | 2.52 (-4.07, 9.12)    | 0.764                 | 370.4 (205.1)  |    | 375.5 (213.2)  |    | 361.4 (207.3)  |    | 0.411                 | 2.53 (-5.42, 10.46)   | 0.779                 |
| Legumes, g/d          | 20.8 (14.8)    |    | 20.9 (13.6)    |    | 20.5 (12.5)   |    | 0.617                 | -0.17 (-0.60, 0.26)   | 0.435                 | 20.9 (14.4)    |    | 20.7 (13.1)    |    | 19.9 (10.7)    |    | 0.413                 | -0.25 (-0.77, 0.28)   | 0.365                 |
| Cereals, g/d          | 149.4 (92.6)   |    | 145.0 (87.5)   |    | 143.8 (89.6)  |    | 0.102                 | -2.55 (-5.46, 0.36)   | 0.182                 | 145.7 (90.1)   |    | 147.5 (89.7)   |    | 147.8 (84.6)   |    | 0.698                 | 1.94 (-1.56, 5.45)    | 0.266                 |
| Dairy products, g/d   | 379.8 (227.3)  |    | 388.8 (226.0)  |    | 377.8 (209.3) |    | 0.189                 | -0.67 (-7.86, 6.50)   | 0.855                 | 383.9 (222.0)  |    | 382.7 (223.1)  |    | 399.2 (239.3)  |    | 0.451                 | 2.62 (-6.03, 11.26)   | 0.539                 |
| Meats, g/d            | 133.8 (62.2)   |    | 132.4 (59.5)   |    | 131.3 (56.5)  |    | 0.452                 | -1.57 (-3.47, 0.32)   | 0.104                 | 132.1 (61.4)   |    | 133.7 (57.5)   |    | 133.2 (57.1)   |    | 0.592                 | 1.14 (-1.15, 3.43)    | 0.360                 |
| Fish, g/d             | 100.6 (48.1)   |    | 99.9 (52.2)    |    | 99.9 (56.8)   |    | 0.871                 | -0.44 (-2.10, 1.23)   | 0.608                 | 99.3 (48.8)    |    | 101.1 (56.9)   |    | 101.5 (52.7)   |    | 0.364                 | 1.59 (-0.41, 3.60)    | 0.116                 |
| Pastries, g/d         | 23.1 (32.1)    |    | 22.3 (29.8)    |    | 22.2 (28.9)   |    | 0.563                 | -0.51 (-1.51, 0.49)   | 0.318                 | 22.5 (30.0)    |    | 22.9 (31.2)    |    | 22.1 (29.4)    |    | 0.830                 | -0.11 (-1.10, 1.31)   | 0.883                 |
| Olive oil, g/d        | 39.7 (18.2)    |    | 39.3 (18.0)    |    | 38.9 (17.9)   |    | 0.418                 | -0.31 (-0.85, 0.22)   | 0.252                 | 39.4 (18.0)    |    | 39.1 (18.1)    |    | 39.8 (18.7)    |    | 0.710                 | -0.22 (-0.87, 0.43)   | 0.308                 |
| Nuts, g/d             | 10.2 (13.7)    |    | 10.9 (14.7)    |    | 9.9 (13.2)    |    | 0.061                 | 0.07 (-0.40, 0.53)    | 0.784                 | 10.5 (14.4)    |    | 10.4 (13.7)    |    | 10.7 (13.7)    |    | 0.937                 | -0.04 (-0.57, 0.56)   | 0.891                 |

P1: Unadjusted P value for the comparison of means among genotypes.

P2: P value adjusted for sex, age, field center, diabetes and physical activity
